# Supplementary material for: Sexual dysfunction in Brazilian patients with multiple sclerosis
Source: PubMed Central journal article supplement (PMC10169235; doi:10.1055/s-0043-1767824), 2023-05-09
Supplement: 10-1055-s-0043-1767824-s220157.pdf [file 10-1055-s-0043-1767824-s220157.pdf]

## Supplementary Material

### S1: Multiple Sclerosis Intimacy and Sexuality Questionnaire-19 [MSISQ-19].

#### Instructions

In order to better understand the impact of multiple sclerosis (MS) on intimacy and sexuality, this 19-item questionnaire asks you to rate how various MS symptoms have interfered with your sexual activity or satisfaction over the last 6 months. Questions may be answered by placing a check or any other mark in the square located next to the question and below the appropriate number. There are no right or wrong answers. If you are unsure how to answer a question, please choose the best answer you can.

| Over the last 6 months, the following symptoms have interfered with my sexual activity or satisfaction:            | Never | Rarely | Occasionally | Almost always | Always |
|--------------------------------------------------------------------------------------------------------------------|-------|--------|--------------|---------------|--------|
|                                                                                                                    | 1     | 2      | 3            | 4             | 5      |
| 1. Muscle tightness or spasm in my Arms, legs, or body                                                             |       |        |              |               |        |
| 2. Bladder ou urinary symptoms                                                                                     |       |        |              |               |        |
| 3. Bowel symptoms                                                                                                  |       |        |              |               |        |
| 4. Feelings of dependency because of MS                                                                            |       |        |              |               |        |
| 5. Tremors or shaking in my hands or body                                                                          |       |        |              |               |        |
| 6. Pain, burning, or discomfort in my body                                                                         |       |        |              |               |        |
| 7. Feeling that my body is less attractive                                                                         |       |        |              |               |        |
| 8. Problems moving my body the way I want during sexual activity                                                   |       |        |              |               |        |
| 9. Feeling less masculine or feminine due to MS                                                                    |       |        |              |               |        |
| 10. Problems with concentration, memory, or thinking                                                               |       |        |              |               |        |
| 11. Exacerbation or significant worsening of my MS                                                                 |       |        |              |               |        |
| 12. Less feeling or numbness in my genitals                                                                        |       |        |              |               |        |
| 13. Fear of being rejected sexually because of MS                                                                  |       |        |              |               |        |
| 14. Worries about sexually satisfying my partner                                                                   |       |        |              |               |        |
| 15. Felling less confident about my sexuality due to MS                                                            |       |        |              |               |        |
| 16. Lack of sexual interest or desire                                                                              |       |        |              |               |        |
| 17. Less intense or pleasurable orgasms or climaxes                                                                |       |        |              |               |        |
| 18. Takes too long to orgasm or climax                                                                             |       |        |              |               |        |
| 19. Inadequate vaginal wetness or lubrication (women)/ difficulty getting or keeping a satisfactory erection (men) |       |        |              |               |        |

#### Scoring:

Primary sexual dysfunction subscale items = 12, 16, 17, 18, 19

Secondary sexual dysfunction subscale items = 1, 2, 3, 4, 5, 6, 8, 10, 11

Tertiary sexual dysfunction subscale items = 7, 9, 13, 14, 15

#### Any item scoring "4" or "5" should be discussed with your MS healthcare professional

Source: Silva RAP, Olival GS, Stievano LP, Toller VB, Jordy SS, Eloi M, et al . Validation and cross-cultural adaptation of sexual dysfunction modified scale in multiple sclerosis for Brazilian population. *Arq Neuro-Psiquiatr*. 2015;73( 8 ):681–7.

**S2:** Multiple Sclerosis Intimacy and Sexuality Questionnaire-19 [MSISQ-19] – Brazilian version. [Escala sobre intimidade e sexualidade de 19 itens na Esclerose Múltipla - Multiple Sclerosis Intimacy and Sexuality Questionnaire-19 (MSISQ-19) - validado em português (2015)].

#### Instruções

Para melhor entender o impacto da esclerose múltipla (EM) na intimidade e sexualidade, este questionário com 19 itens pede para você classificar como os diversos sintomas da EM têm interferido na sua atividade sexual ou na sua satisfação sexual nos

últimos 6 meses. As questões podem ser respondidas através de uma marcação no quadrado localizado ao lado da questão e abaixo do número que correspondente à sua resposta. Não existe resposta certa ou errada. Caso você não tenha certeza de como responder à pergunta, por favor, escolha a melhor resposta que você puder.

| Nos últimos 6 meses, os sintomas abaixo têm interferido na minha atividade sexual e satisfação sexual              | Nunca | Quase nunca | Ocasionalmente | Quase sempre | Sempre |
|--------------------------------------------------------------------------------------------------------------------|-------|-------------|----------------|--------------|--------|
|                                                                                                                    | 1     | 2           | 3              | 4            | 5      |
| 1. Rigidez muscular nos meus braços, pernas ou corpo                                                               |       |             |                |              |        |
| 2. Sintomas de incontinência urinária                                                                              |       |             |                |              |        |
| 3. Sintomas no intestino                                                                                           |       |             |                |              |        |
| 4. Sentimentos de dependência por causa da EM                                                                      |       |             |                |              |        |
| 5. Tremores ou agitações em minhas mãos e corpo                                                                    |       |             |                |              |        |
| 6. Dor, queimação ou desconforto em meu corpo                                                                      |       |             |                |              |        |
| 7. Sentimento de que meu corpo é menos atrativo                                                                    |       |             |                |              |        |
| 8. Problemas movendo meu corpo do jeito que eu quero durante a atividade sexual                                    |       |             |                |              |        |
| 9. Sentindo-me menos masculino ou feminino devido à EM                                                             |       |             |                |              |        |
| 10. Problemas de concentração, memória ou pensamentos                                                              |       |             |                |              |        |
| 11. Exacerbação ou significativo agravamento da minha EM                                                           |       |             |                |              |        |
| 12. Menor sensibilidade ou entorpecimento das minhas genitais                                                      |       |             |                |              |        |
| 13. Medo de ser rejeitado sexualmente por causa da EM                                                              |       |             |                |              |        |
| 14. Preocupações a respeito da satisfação sexual do meu parceiro                                                   |       |             |                |              |        |
| 15. Sentindo-me menos confiante sobre minha sexualidade devido à EM                                                |       |             |                |              |        |
| 16. Falta de desejo ou interesse sexual                                                                            |       |             |                |              |        |
| 17. Orgasmo ou clímax menos intensos e/ou menos prazerosos                                                         |       |             |                |              |        |
| 18. Demora ao orgasmo ou clímax                                                                                    |       |             |                |              |        |
| 19. Lubrificação e umidade vaginal inadequada (mulher)/ dificuldade de obter ou manter ereção satisfatória (homem) |       |             |                |              |        |

**Escore:**

Disfunção sexual primária = questões 12, 16, 17, 18, 19

Disfunção sexual secundária = questões 1, 2, 3, 4, 5, 6, 8, 10, 11

Disfunção sexual terciária = questões 7, 9, 13, 14, 15

**Qualquer resposta “4” ou “5” deve ser discutida com o profissional de saúde.**

Source: Silva RAP, Olival GS, Stievano LP, Toller VB, Jordy SS, Eloi M, et al. Validation and cross-cultural adaptation of sexual dysfunction modified scale in multiple sclerosis for Brazilian population. *Arq Neuro-Psiquiatr.* 2015;73(8): 681–7.
